# Supplementary material
Source: MDPI journal article supplement (https://www.mdpi.com/2673-1592/4/4/56)
Supplement: s1 [file s1]

Archive with 6 entries (6 files):
- Supplement S1_revised.pdf
- Supplement S2_revised.pdf
- Supplement S3_revised.pdf
- Supplement S4_revised.pdf
- Supplement S5_revised.pdf
- Supplement S6_revised.pdf
